# Supplementary material for: Photonic interaction between quantum dots and gold nanoparticles in discrete nanostructures through DNA directed self-assembly
Source: Royal Society of Chemistry journal article supplement (doi:10.1039/b915712c), 2009-11-18
Supplement: b915712c.pdf [file b915712c.pdf]

51 mer: 5'-thiol-C6- TGC AGT AAG TAT CTC AAC AAG GTC TTG ACT ATG AGT  
GCT ACT AAA TCG TCT;

20 mer: 5'-thiol-C6- TGC AGT AAG TAT AAT CGT CT.
